# Supplementary material
Source: PubMed Central journal article supplement (PMC3351925)
Supplement: cr2011158x3.pdf [file cr2011158x3.pdf]

**Supplementary information, Table S3** The level of plant miRNAs in chow diet, rice, Chinese cabbage, wheat, and potato.

|                                                     | MIR156a<br>(fmol/g) | MIR166a<br>(fmol/g) | MIR168a<br>(fmol/g) |
|-----------------------------------------------------|---------------------|---------------------|---------------------|
| chow diet                                           | 0.54                | 0.66                | 0.43                |
| rice ( <i>Oryza sativa</i> )                        | 5.72                | 2.25                | 2.44                |
| cooked rice                                         | 0.33                | 0.01                | 0.95                |
| Chinese cabbage ( <i>Brassica rapa pekinensis</i> ) | 2.62                | 2.29                | 1.68                |
| cooked Chinese cabbage                              | 0.58                | 1.8                 | 0.28                |
| wheat ( <i>Triticum aestivum</i> )                  | 0.35                | 0.04                | undetectable        |
| cooked wheat                                        | 0.47                | 0.17                | undetectable        |
| potato ( <i>Solanum tuberosum</i> )                 | 2.01                | 0.02                | 0.23                |
| cooked potato                                       | 0.49                | 0.01                | undetectable        |
