# Supplementary material
Source: PubMed Central journal article supplement (PMC3351925)
Supplement: cr2011158x4.pdf [file cr2011158x4.pdf]

**Supplementary information, Table S4** Potential mammalian genes identified as MIR168a targets.

| cDNA ID         | Name    | Binding site                                                 | Identical number | Score | cDNA length | Start | End  |
|-----------------|---------|--------------------------------------------------------------|------------------|-------|-------------|-------|------|
| ENST00000375759 | SPEN    | 1 TCGCTTGGTGCAGAT 15<br>       <br>3927 TCGCTTGGTGCAGAT 3913 | 15               | 0.714 | 12227       | 3913  | 3927 |
| ENST00000322366 | WDFY3   | 7 GGTGCAGATCGGGA 20<br>       <br>7838 GGTGCAGATCGGGA 7825   | 14               | 0.667 | 14264       | 7825  | 7838 |
| ENST00000295888 | WDFY3   | 7 GGTGCAGATCGGGA 20<br>       <br>7889 GGTGCAGATCGGGA 7876   | 14               | 0.667 | 14315       | 7876  | 7889 |
| ENST00000380250 | FRY     | 3 GCTTGGTGCAGATC 16<br>       <br>9431 GCTTGGTGCAGATC 9418   | 14               | 0.667 | 10717       | 9418  | 9431 |
| ENST00000380257 | FRY     | 3 GCTTGGTGCAGATC 16<br>       <br>9458 GCTTGGTGCAGATC 9445   | 14               | 0.667 | 10744       | 9445  | 9458 |
| ENST00000380226 | FRY     | 3 GCTTGGTGCAGATC 16<br>       <br>1783 GCTTGGTGCAGATC 1770   | 14               | 0.667 | 3043        | 1770  | 1783 |
| ENST00000267067 | FRY     | 3 GCTTGGTGCAGATC 16<br>       <br>8719 GCTTGGTGCAGATC 8706   | 14               | 0.667 | 10005       | 8706  | 8719 |
| ENST00000380217 | FRY     | 3 GCTTGGTGCAGATC 16<br>       <br>500 GCTTGGTGCAGATC 487     | 14               | 0.667 | 650         | 487   | 500  |
| ENST00000361215 | PPP1R3E | 6 TGGTGCAGATCGGG 19<br>       <br>476 TGGTGCAGATCGGG 463     | 14               | 0.667 | 4495        | 463   | 476  |
| ENST00000262316 | RHBDF1  | 5 TTGGTGCAGATCGG 18<br>       <br>1838 TTGGTGCAGATCGG 1825   | 14               | 0.667 | 2953        | 1825  | 1838 |
| ENST00000338527 | RHBDF1  | 5 TTGGTGCAGATCGG 18<br>       <br>1923 TTGGTGCAGATCGG 1910   | 14               | 0.667 | 3038        | 1910  | 1923 |
| ENST00000374338 | LDLRAP1 | 2 CGCTTGGTGCAGA 14<br>       <br>566 CGCTTGGTGCAGA 554       | 13               | 0.619 | 2935        | 554   | 566  |
| ENST00000263257 | NOVA2   | 2 CGCTTGGTGCAGA 14<br>       <br>119 CGCTTGGTGCAGA 107       | 13               | 0.619 | 1857        | 107   | 119  |

|                 |        |                                                   |    |       |      |      |      |
|-----------------|--------|---------------------------------------------------|----|-------|------|------|------|
| ENST00000245816 | CLPP   | 7 GGTGCAGATCGGG 19<br>                            | 13 | 0.619 | 1151 | 546  | 558  |
|                 |        | 558 GGTGCAGATCGGG 546<br>3 GCTTGGTGCAGAT 15<br>   |    |       |      |      |      |
| ENST00000395045 | MATK   | 960 GCTTGGTGCAGAT 948<br>3 GCTTGGTGCAGAT 15<br>   | 13 | 0.619 | 2078 | 948  | 960  |
| ENST00000315548 | MATK   | 622 GCTTGGTGCAGAT 610<br>3 GCTTGGTGCAGAT 15<br>   | 13 | 0.619 | 1740 | 610  | 622  |
| ENST00000310132 | MATK   | 1019 GCTTGGTGCAGAT 1007<br>3 GCTTGGTGCAGAT 15<br> | 13 | 0.619 | 2137 | 1007 | 1019 |
| ENST00000395040 | MATK   | 796 GCTTGGTGCAGAT 784<br>4 CTTGGTGCAGATC 16<br>   | 13 | 0.619 | 1914 | 784  | 796  |
| ENST00000325464 | MED16  | 1909 CTTGGTGCAGATC 1897<br>4 CTTGGTGCAGATC 16<br> | 13 | 0.619 | 2922 | 1897 | 1909 |
| ENST00000395808 | MED16  | 1891 CTTGGTGCAGATC 1879<br>4 CTTGGTGCAGATC 16<br> | 13 | 0.619 | 3068 | 1879 | 1891 |
| ENST00000312090 | MED16  | 1891 CTTGGTGCAGATC 1879<br>4 CTTGGTGCAGATC 16<br> | 13 | 0.619 | 3125 | 1879 | 1891 |
| ENST00000269814 | MED16  | 1891 CTTGGTGCAGATC 1879<br>3 GCTTGGTGCAGAT 15<br> | 13 | 0.619 | 2875 | 1879 | 1891 |
| ENST00000346473 | DDIT   | 686 GCTTGGTGCAGAT 674<br>2 CGCTTGGTGCAGA 14<br>   | 13 | 0.619 | 909  | 674  | 686  |
| ENST00000358637 | ASTN2  | 1955 CGCTTGGTGCAGA 1943<br>2 CGCTTGGTGCAGA 14<br> | 13 | 0.619 | 3411 | 1943 | 1955 |
| ENST00000369682 | PLXNA3 | 1053 CGCTTGGTGCAGA 1041<br>8 GTGCAGATCGGGA 20<br> | 13 | 0.619 | 6745 | 1041 | 1053 |
| ENST00000328831 | ATP2B3 | 1243 GTGCAGATCGGGA 1231<br>8 GTGCAGATCGGGA 20<br> | 13 | 0.619 | 3513 | 1231 | 1243 |
| ENST00000393842 | ATP2B3 | 1479 GTGCAGATCGGGA 1467<br>8 GTGCAGATCGGGA 20<br> | 13 | 0.619 | 4064 | 1467 | 1479 |
| ENST00000370186 | ATP2B3 |                                                   | 13 | 0.619 | 6742 | 1389 | 1401 |

|                 |            |                    |      |    |       |      |      |      |
|-----------------|------------|--------------------|------|----|-------|------|------|------|
|                 |            | 1401 GTGCAGATCGGGA | 1389 |    |       |      |      |      |
| ENST00000359149 | ATP2B3     | 8 GTGCAGATCGGGA    | 20   | 13 | 0.619 | 6574 | 1231 | 1243 |
|                 |            |                    |      |    |       |      |      |      |
|                 |            | 1243 GTGCAGATCGGGA | 1231 |    |       |      |      |      |
| ENST00000370181 | ATP2B3     | 8 GTGCAGATCGGGA    | 20   | 13 | 0.619 | 6532 | 1189 | 1201 |
|                 |            |                    |      |    |       |      |      |      |
|                 |            | 1201 GTGCAGATCGGGA | 1189 |    |       |      |      |      |
| ENST00000349466 | ATP2B3     | 8 GTGCAGATCGGGA    | 20   | 13 | 0.619 | 4280 | 1431 | 1443 |
|                 |            |                    |      |    |       |      |      |      |
|                 |            | 1443 GTGCAGATCGGGA | 1431 |    |       |      |      |      |
| ENST00000263519 | ATP2B3     | 8 GTGCAGATCGGGA    | 20   | 13 | 0.619 | 6420 | 1231 | 1243 |
|                 |            |                    |      |    |       |      |      |      |
|                 |            | 1243 GTGCAGATCGGGA | 1231 |    |       |      |      |      |
| ENST00000316366 | NAALADL2   | 5 TTGGTGCAGATCG    | 17   | 13 | 0.619 | 4795 | 304  | 316  |
|                 |            |                    |      |    |       |      |      |      |
|                 |            | 316 TTGGTGCAGATCG  | 304  |    |       |      |      |      |
| ENST00000254508 | NUP210     | 8 GTGCAGATCGGGA    | 20   | 13 | 0.619 | 7191 | 4380 | 4392 |
|                 |            |                    |      |    |       |      |      |      |
|                 |            | 4392 GTGCAGATCGGGA | 4380 |    |       |      |      |      |
| ENST00000352432 | ATP2B2     | 8 GTGCAGATCGGGA    | 20   | 13 | 0.619 | 6669 | 1367 | 1379 |
|                 |            |                    |      |    |       |      |      |      |
|                 |            | 1379 GTGCAGATCGGGA | 1367 |    |       |      |      |      |
| ENST00000343816 | ATP2B2     | 8 GTGCAGATCGGGA    | 20   | 13 | 0.619 | 6762 | 1460 | 1472 |
|                 |            |                    |      |    |       |      |      |      |
|                 |            | 1472 GTGCAGATCGGGA | 1460 |    |       |      |      |      |
| ENST00000360273 | ATP2B2     | 8 GTGCAGATCGGGA    | 20   | 13 | 0.619 | 6804 | 1502 | 1514 |
|                 |            |                    |      |    |       |      |      |      |
|                 |            | 1514 GTGCAGATCGGGA | 1502 |    |       |      |      |      |
| ENST00000383800 | ATP2B2     | 8 GTGCAGATCGGGA    | 20   | 13 | 0.619 | 8900 | 1560 | 1572 |
|                 |            |                    |      |    |       |      |      |      |
|                 |            | 1572 GTGCAGATCGGGA | 1560 |    |       |      |      |      |
| ENST00000342354 | ATP2B2     | 8 GTGCAGATCGGGA    | 20   | 13 | 0.619 | 3916 | 1502 | 1514 |
|                 |            |                    |      |    |       |      |      |      |
|                 |            | 1514 GTGCAGATCGGGA | 1502 |    |       |      |      |      |
| ENST00000397077 | ATP2B2     | 8 GTGCAGATCGGGA    | 20   | 13 | 0.619 | 8964 | 1624 | 1636 |
|                 |            |                    |      |    |       |      |      |      |
|                 |            | 1636 GTGCAGATCGGGA | 1624 |    |       |      |      |      |
| ENST00000401915 | AP000281.1 | 3 GCTTGGTGCAGAT    | 15   | 13 | 0.619 | 316  | 84   | 96   |
|                 |            |                    |      |    |       |      |      |      |
|                 |            | 96 GCTTGGTGCAGAT   | 84   |    |       |      |      |      |
| ENST00000292211 | UBE2Q1     | 4 CTTGGTGCAGATC    | 16   | 13 | 0.619 | 3223 | 1303 | 1315 |
|                 |            |                    |      |    |       |      |      |      |
|                 |            | 1315 CTTGGTGCAGATC | 1303 |    |       |      |      |      |

|                 |               |                                                                  |    |       |      |     |     |
|-----------------|---------------|------------------------------------------------------------------|----|-------|------|-----|-----|
| ENST00000402058 | RP11-481A12.5 | 1 TCGCTGGTGCAG 13<br>                   <br>141 TCGCTGGTGCAG 129 | 13 | 0.619 | 2455 | 129 | 141 |
| ENST00000402038 | PARG          | 1 TCGCTGGTGCAG 13<br>                   <br>39 TCGCTGGTGCAG 27   | 13 | 0.619 | 3986 | 27  | 39  |
| ENST00000399369 | PARG          | 1 TCGCTGGTGCAG 13<br>                   <br>300 TCGCTGGTGCAG 288 | 13 | 0.619 | 2001 | 288 | 300 |

---
