# Supplementary material
Source: PubMed Central journal article supplement (PMC3351925)
Supplement: cr2011158x5.pdf [file cr2011158x5.pdf]

**Supplementary information, Table S5** The fundamental ingredients of the chow diet and fresh rice.

| Ingredients      | Chow <sup>*</sup> | Fresh rice |
|------------------|-------------------|------------|
| Fat              | 13                | 3          |
| Protein          | 25                | 14         |
| Carbohydrates    | 62                | 83         |
| Energy (kcal/gm) | 3.4               | 3.5        |

\*The raw materials used to make the chow diet are ground corn, dehulled soybean meal, wheat middlings, ground wheat, wheat germ, dried beef pulp, alfalfa meal, ground oats, soybean oil, fish meal, dried whey, and Brewers' dried yeast.
