# Supplementary material
Source: PubMed Central journal article supplement (PMC3351925)
Supplement: cr2011158x9.pdf [file cr2011158x9.pdf]

## Supplementary information, Figure S4

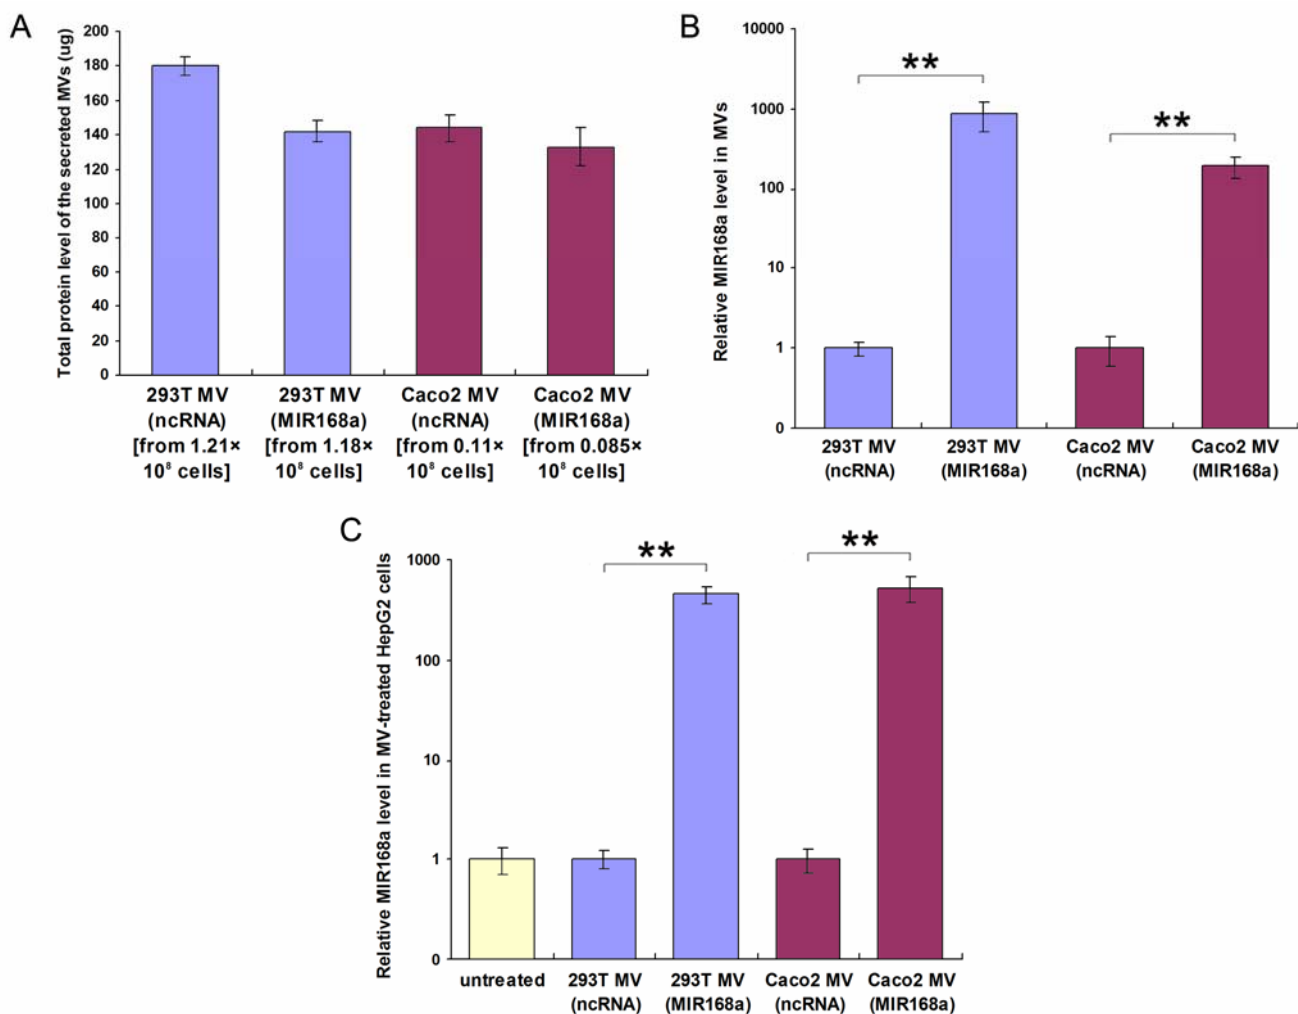

**Figure S4** An analysis of the MIR168a levels in MVs from 293T or Caco-2 cells transfected with 20 pmol/10<sup>5</sup> MIR168a and in HepG2 cells after treatment with MVs from 293T or Caco-2 cells. **(A)** The protein level in MVs. **(B)** The MIR168a level in MVs. **(C)** The MIR168a levels in HepG2 cells after treatment with MVs from 293T or Caco-2 cells. \**P* < 0.05; \*\**P* < 0.01.
