# Supplementary material
Source: PubMed Central journal article supplement (PMC3351925)
Supplement: cr2011158x11.pdf [file cr2011158x11.pdf]

## Supplementary information, Figure S6

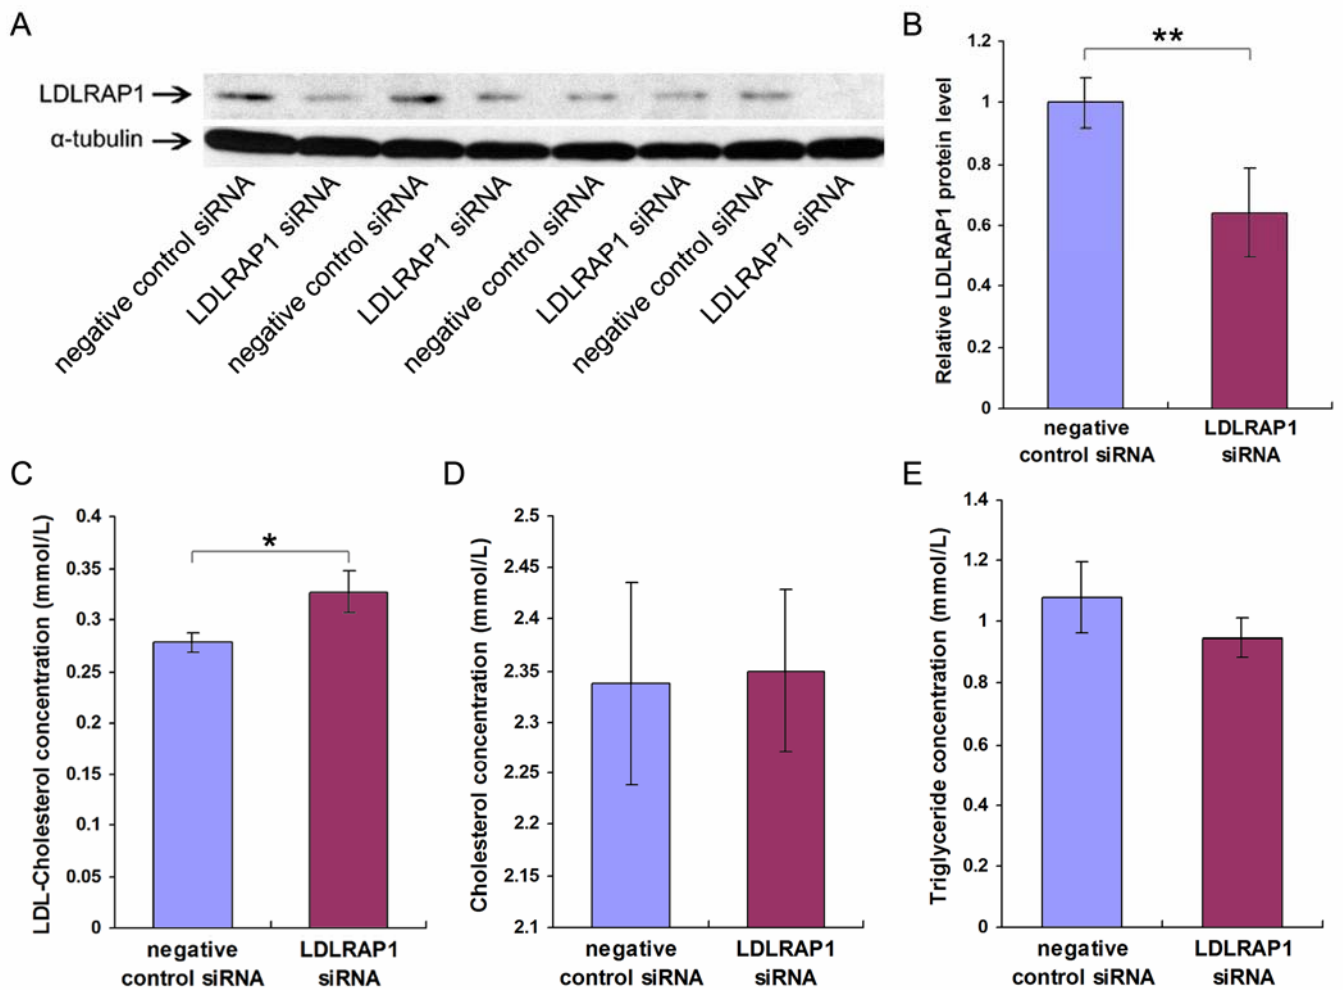

**Figure S6** The effects of LDLRAP1 siRNA on the levels of mouse liver LDLRAP1 and mouse plasma LDL-cholesterol, cholesterol, and triglycerides. **(A)** The LDLRAP1 protein level in mouse livers after intravenous injection with LDLRAP1 siRNA or negative control siRNA ( $n = 8$ ). **(B)** The quantification of LDLRAP1 protein expression in **A**. **(C-E)** The levels of LDL-cholesterol **(C)**, cholesterol **(D)**, and triglycerides **(E)** in mouse plasma after intravenous injection with LDLRAP1 siRNA or negative control siRNA ( $n = 8$ ). \* $P < 0.05$ ; \*\* $P < 0.01$ .
